# Supplementary material for: Combined biotic stresses trigger similar transcriptomic responses but contrasting resistance against a chewing herbivore in Brassica nigra
Source: PubMed Central journal article supplement (PMC5513356; doi:10.1186/s12870-017-1074-7), 2017-07-17
Supplement: 12870_2017_1074_MOESM2_ESM.pdf [file 12870_2017_1074_MOESM2_ESM.pdf]

**downregulated genes**

|            |   |                                                 |    |    |       |       |          |          |                                                                                                              |
|------------|---|-------------------------------------------------|----|----|-------|-------|----------|----------|--------------------------------------------------------------------------------------------------------------|
| GO:0044237 | P | cellular metabolic process                      | 26 | 47 | 8722  | 37767 | 1.90E-06 | 7.50E-05 | At4g20960, At2g02220, At5g54770, At1g06430, At1g70600, At1g55090, At1g08380, At3g24190, At2g34480, At1g12900 |
| GO:0015979 | P | photosynthesis                                  | 5  | 47 | 162   | 37767 | 2.10E-06 | 7.50E-05 | At3g55800, At3g27690, At1g61520, At1g08380, At3g01440                                                        |
| GO:0034641 | P | cellular nitrogen compound metabolic process    | 7  | 47 | 506   | 37767 | 3.20E-06 | 7.70E-05 | At4g20960, At1g55090, At5g54770, At4g27440, At4g38970, At5g17920, At2g43360                                  |
| GO:0008152 | P | metabolic process                               | 28 | 47 | 10614 | 37767 | 6.60E-06 | 0.00012  | At4g20960, At2g02220, At5g54770, At1g06430, At4g20760, At1g70600, At1g55090, At1g08380, At3g24190, At2g34480 |
| GO:0044271 | P | cellular nitrogen compound biosynthetic process | 5  | 47 | 394   | 37767 | 0.00014  | 0.0018   | At4g20960, At2g43360, At5g54770, At4g27440, At5g17920                                                        |
| GO:0009987 | P | cellular process                                | 27 | 47 | 11684 | 37767 | 0.00015  | 0.0018   | At4g20960, At2g02220, At5g54770, At1g06430, At1g70600, At1g55090, At1g08380, At3g24190, At2g34480, At1g12900 |
| GO:0001883 | F | purine nucleoside binding                       | 7  | 47 | 1465  | 37767 | 0.0021   | 0.014    | At1g55090, At2g02220, At3g24190, At3g28540, At3g03960, At4g28070, At2g45340                                  |
| GO:0001882 | F | nucleoside binding                              | 7  | 47 | 1465  | 37767 | 0.0021   | 0.014    | At1g55090, At2g02220, At3g24190, At3g28540, At3g03960, At4g28070, At2g45340                                  |
| GO:0000166 | F | nucleotide binding                              | 9  | 47 | 2267  | 37767 | 0.0017   | 0.014    | At1g55090, At2g02220, At3g24190, At2g45340, At3g28540, At3g03960, At4g28070, At5g04810, At1g43190            |
| GO:0005524 | F | ATP binding                                     | 7  | 47 | 1377  | 37767 | 0.0015   | 0.014    | At1g55090, At2g02220, At3g24190, At3g28540, At3g03960, At4g28070, At2g45340                                  |
| GO:0003824 | F | catalytic activity                              | 22 | 47 | 9638  | 37767 | 0.0013   | 0.014    | At4g20960, At4g24780, At2g02220, At1g06430, At3g26060, At4g27440, At5g19220, At1g55090, At3g24190, At3g28540 |
| GO:0030554 | F | adenyl nucleotide binding                       | 7  | 47 | 1465  | 37767 | 0.0021   | 0.014    | At1g55090, At2g02220, At3g24190, At3g28540, At3g03960, At4g28070, At2g45340                                  |
| GO:0032559 | F | adenyl ribonucleotide binding                   | 7  | 47 | 1384  | 37767 | 0.0016   | 0.014    | At1g55090, At2g02220, At3g24190, At3g28540, At3g03960, At4g28070, At2g45340                                  |
| GO:0032555 | F | purine ribonucleotide binding                   | 7  | 47 | 1631  | 37767 | 0.0039   | 0.02     | At1g55090, At2g02220, At3g24190, At3g28540, At3g03960, At4g28070, At2g45340                                  |
| GO:0032553 | F | ribonucleotide binding                          | 7  | 47 | 1631  | 37767 | 0.0039   | 0.02     | At1g55090, At2g02220, At3g24190, At3g28540, At3g03960, At4g28070, At2g45340                                  |
| GO:0017076 | F | purine nucleotide binding                       | 7  | 47 | 1713  | 37767 | 0.0051   | 0.023    | At1g55090, At2g02220, At3g24190, At3g28540, At3g03960, At4g28070, At2g45340                                  |
| GO:0044435 | C | plastid part                                    | 10 | 47 | 867   | 37767 | 1.00E-07 | 4.00E-06 | At3g63140, At2g47400, At5g54770, At5g17670, At1g61520, At3g26060, At3g01440, At4g38970, At5g38410, At5g13630 |
| GO:0009507 | C | chloroplast                                     | 16 | 47 | 2740  | 37767 | 1.00E-07 | 4.00E-06 | At4g20960, At3g63140, At5g17670, At2g47400, At3g24190, At5g54770, At4g27440, At1g06430, At1g61520, At3g26060 |
| GO:0009536 | C | plastid                                         | 16 | 47 | 2965  | 37767 | 3.00E-07 | 6.40E-06 | At4g20960, At3g63140, At5g17670, At2g47400, At3g24190, At5g54770, At4g27440, At1g06430, At1g61520, At3g26060 |
| GO:0044434 | C | chloroplast part                                | 9  | 47 | 746   | 37767 | 3.30E-07 | 6.40E-06 | At3g63140, At2g47400, At5g17670, At1g61520, At3g26060, At3g01440, At4g38970, At5g38410, At5g13630            |
| GO:0044446 | C | intracellular organelle part                    | 14 | 47 | 2561  | 37767 | 1.80E-06 | 2.00E-05 | At3g63140, At2g47400, At5g13930, At5g54770, At2g34480, At5g17670, At1g61520, At3g26060, At3g01440, At4g38970 |
| GO:0044444 | C | cytoplasmic part                                | 22 | 47 | 6289  | 37767 | 1.50E-06 | 2.00E-05 | At4g20960, At5g54770, At1g06430, At3g26060, At1g70600, At5g46580, At3g24190, At2g34480, At5g13930, At5g04810 |
| GO:0044422 | C | organelle part                                  | 14 | 47 | 2562  | 37767 | 1.80E-06 | 2.00E-05 | At3g63140, At2g47400, At5g13930, At5g54770, At2g34480, At5g17670, At1g61520, At3g26060, At3g01440, At4g38970 |
| GO:0005622 | C | intracellular                                   | 27 | 47 | 9671  | 37767 | 3.70E-06 | 3.60E-05 | At4g20960, At5g54770, At1g06430, At3g26060, At1g70600, At5g46580, At3g15680, At1g08380, At3g24190, At2g34480 |
| GO:0005737 | C | cytoplasm                                       | 22 | 47 | 6822  | 37767 | 6.00E-06 | 5.10E-05 | At4g20960, At5g54770, At1g06430, At3g26060, At1g70600, At5g46580, At3g24190, At2g34480, At5g13930, At5g04810 |
| GO:0044424 | C | intracellular part                              | 26 | 47 | 9302  | 37767 | 6.70E-06 | 5.20E-05 | At4g20960, At5g54770, At1g06430, At3g26060, At1g70600, At5g46580, At1g08380, At3g24190, At2g34480, At5g13930 |
| GO:0043226 | C | organelle                                       | 22 | 47 | 8155  | 37767 | 0.00011  | 0.0007   | At4g20960, At5g54770, At1g06430, At3g26060, At1g70600, At5g46580, At3g24190, At2g34480, At5g13930, At5g04810 |
| GO:0043229 | C | intracellular organelle                         | 22 | 47 | 8149  | 37767 | 0.00011  | 0.0007   | At4g20960, At5g54770, At1g06430, At3g26060, At1g70600, At5g46580, At3g24190, At2g34480, At5g13930, At5g04810 |
| GO:0005623 | C | cell                                            | 31 | 47 | 15217 | 37767 | 0.00034  | 0.0018   | At4g20960, At4g24780, At5g54770, At1g06430, At3g26060, At1g70600, At5g46580, At3g15680, At1g08380, At2g45340 |
| GO:0044464 | C | cell part                                       | 31 | 47 | 15217 | 37767 | 0.00034  | 0.0018   | At4g20960, At4g24780, At5g54770, At1g06430, At3g26060, At1g70600, At5g46580, At3g15680, At1g08380, At2g45340 |
| GO:0032991 | C | macromolecular complex                          | 9  | 47 | 2180  | 37767 | 0.0013   | 0.0067   | At1g08380, At5g38410, At3g27690, At2g34480, At1g61520, At3g01440, At2g07696, At1g70600, At5g13630            |
| GO:0043227 | C | membrane-bounded organelle                      | 18 | 47 | 7622  | 37767 | 0.0033   | 0.015    | At4g20960, At1g43190, At3g63140, At5g17670, At2g47400, At3g24190, At5g54770, At4g27440, At1g06430, At1g61520 |
| GO:0043231 | C | intracellular membrane-bounded organelle        | 18 | 47 | 7615  | 37767 | 0.0032   | 0.015    | At4g20960, At1g43190, At3g63140, At5g17670, At2g47400, At3g24190, At5g54770, At4g27440, At1g06430, At1g61520 |
| GO:0043234 | C | protein complex                                 | 6  | 47 | 1443  | 37767 | 0.0088   | 0.036    | At1g08380, At5g38410, At3g27690, At1g61520, At3g01440, At5g13630                                             |
| GO:0043232 | C | intracellular non-membrane-bounded organelle    | 5  | 47 | 1040  | 37767 | 0.0094   | 0.036    | At1g70600, At5g41790, At2g34480, At5g38410, At2g07696                                                        |
| GO:0043228 | C | non-membrane-bounded organelle                  | 5  | 47 | 1040  | 37767 | 0.0094   | 0.036    | At1g70600, At5g41790, At2g34480, At5g38410, At2g07696                                                        |
