# Supplementary material for: Combined biotic stresses trigger similar transcriptomic responses but contrasting resistance against a chewing herbivore in Brassica nigra
Source: PubMed Central journal article supplement (PMC5513356; doi:10.1186/s12870-017-1074-7), 2017-07-17
Supplement: 12870_2017_1074_MOESM3_ESM.pdf [file 12870_2017_1074_MOESM3_ESM.pdf]

**A**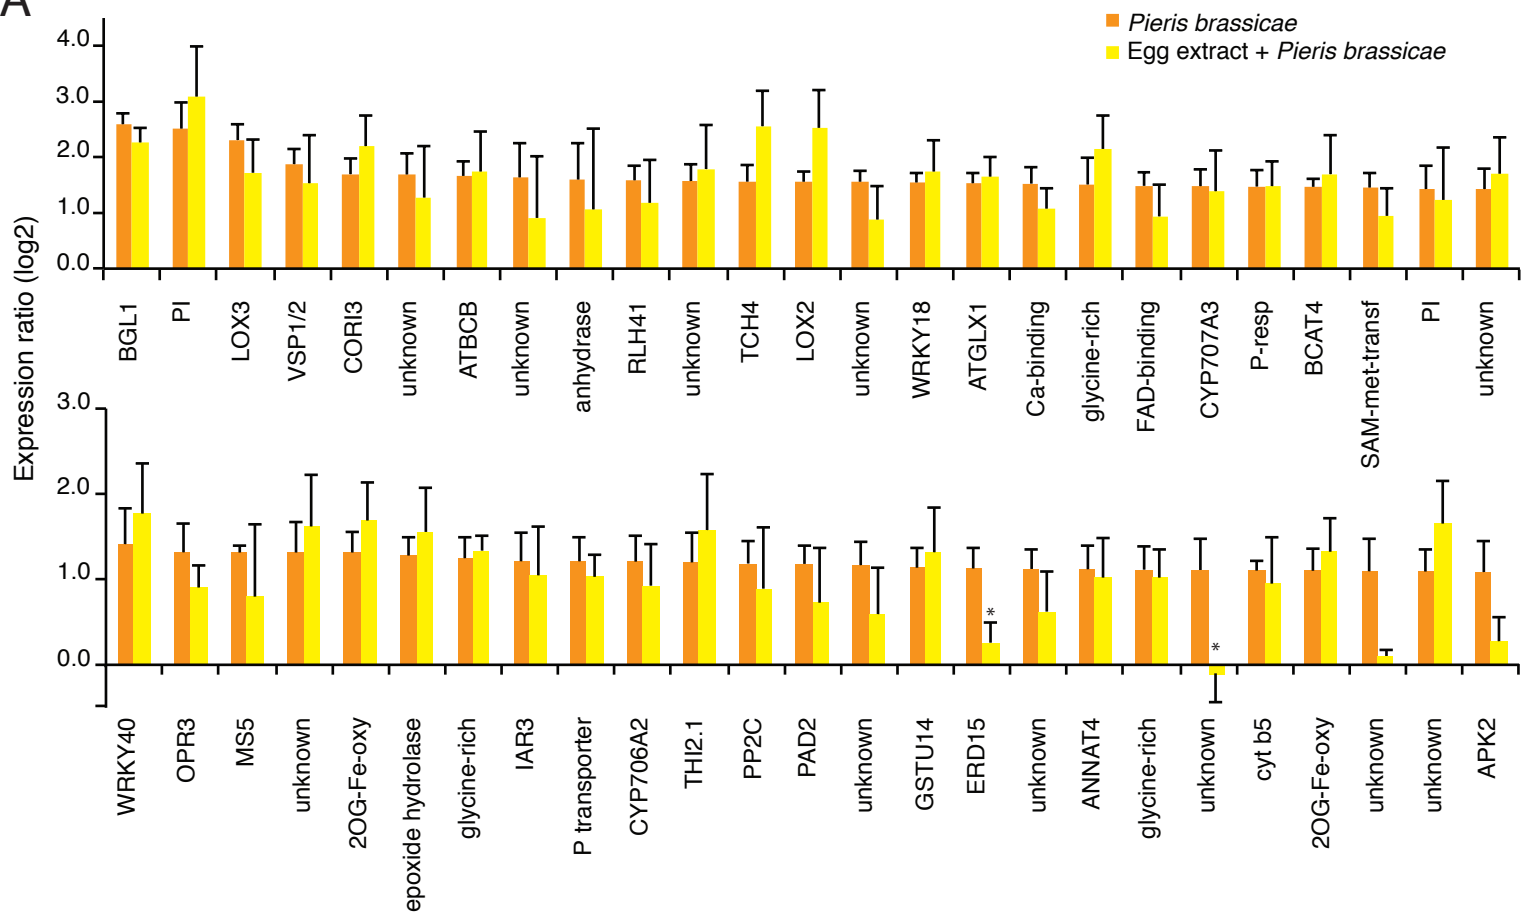**B**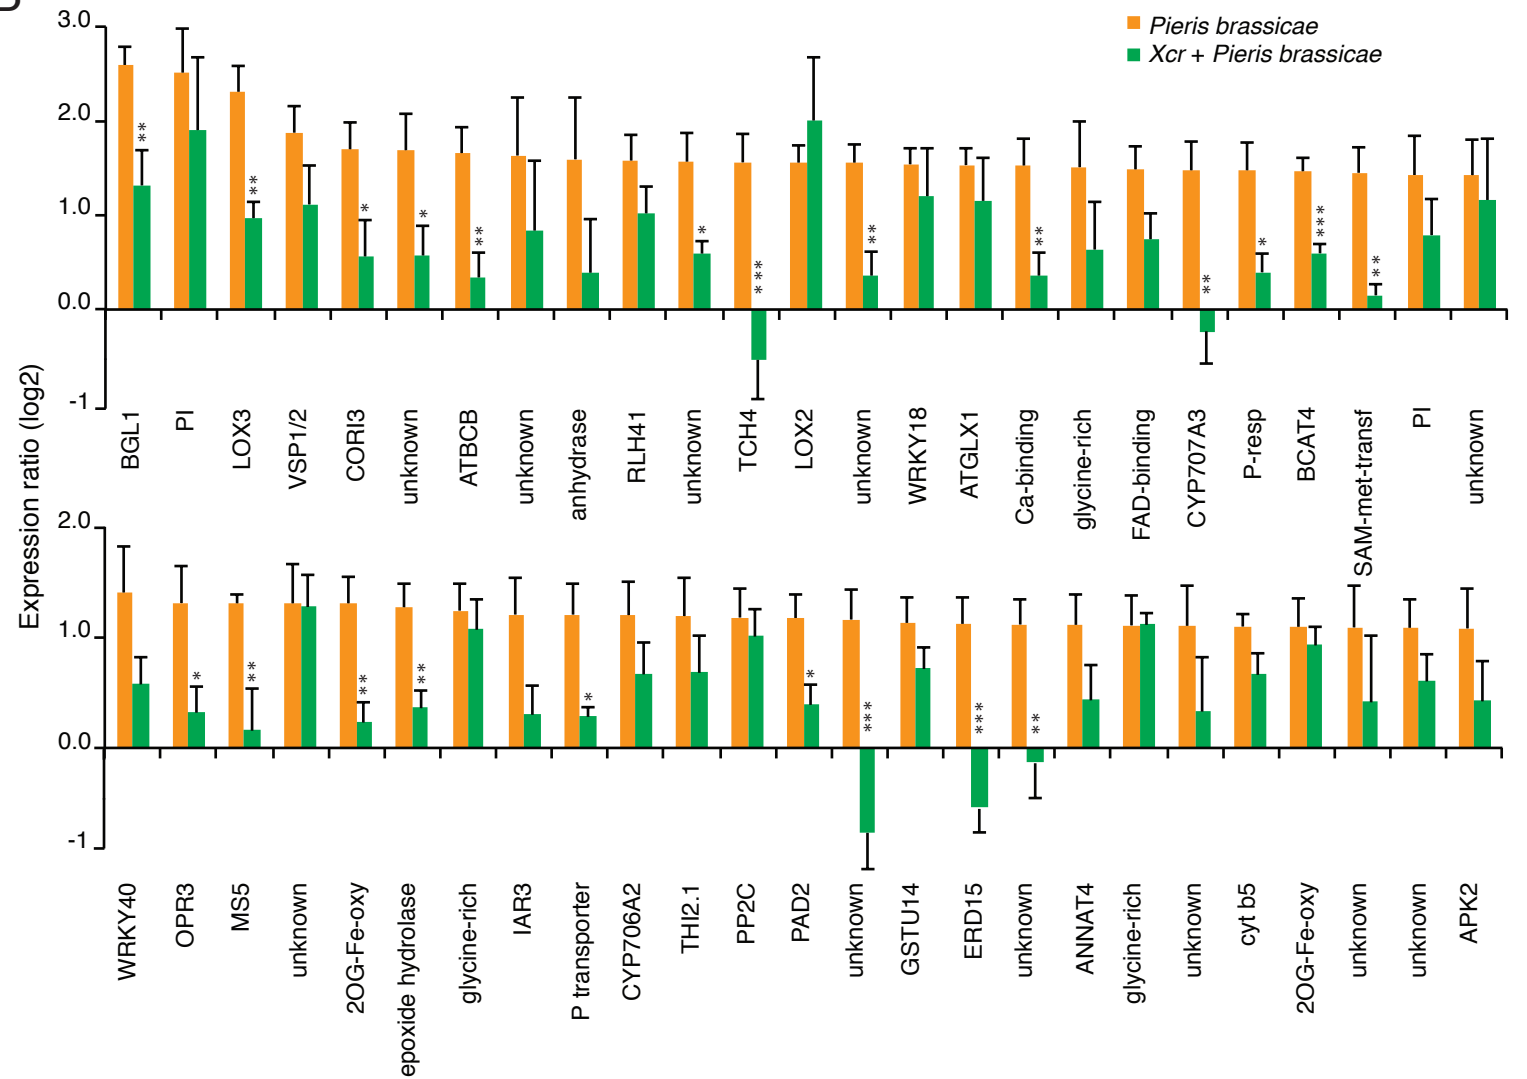

Fig. S1

Continued

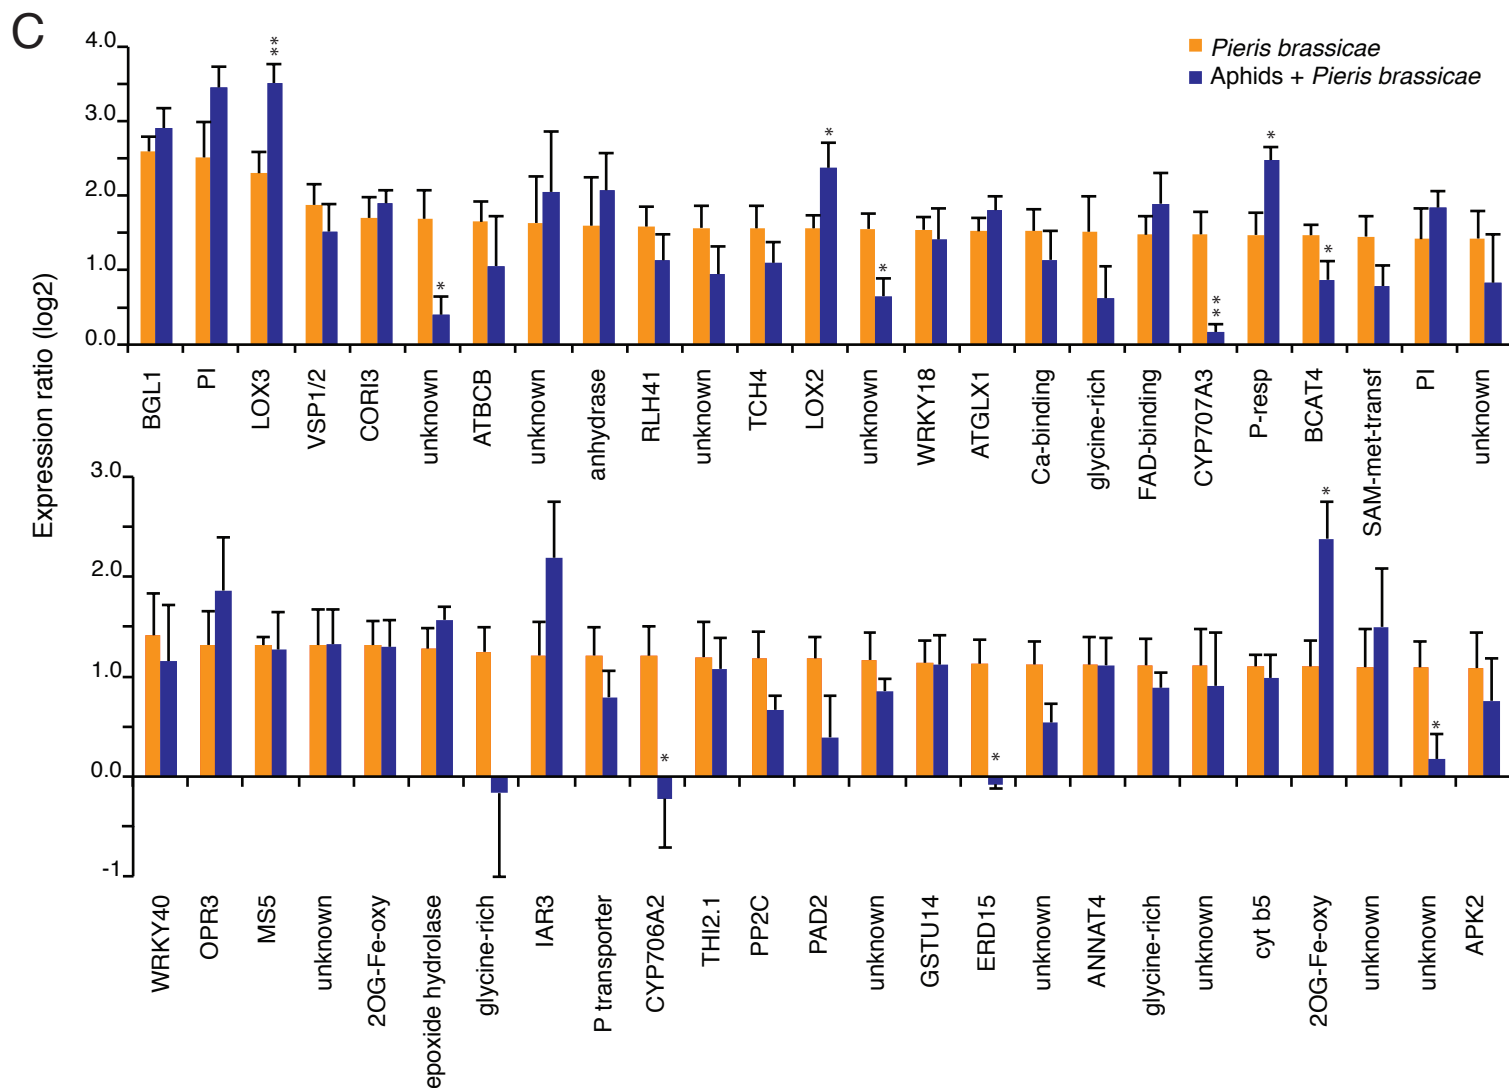

**Fig. S1.** Expression of the top-50 upregulated genes in response to *P. brassicae* feeding and combined stresses. The highest significantly upregulated genes ( $\log_2 > 0.585$ ,  $P < 0.05$ ) were extracted from microarray data (orange bars) and plotted with values from combined stresses. (A) Egg extract /*P. brassicae* larvae (yellow bars), (B) *Xanthomonas campestris* pv. *raphani* /*P. brassicae* larvae (green bars), and (C) *Brevicoryne brassicae* /*P. brassicae* larvae (blue bars). Significant differences between single and combined stress are indicated (Student's *t*-test, \*\*\* $P < 0.001$ , \*\* $P < 0.01$ , \* $P < 0.05$ ).
