# Supplementary material for: Combined biotic stresses trigger similar transcriptomic responses but contrasting resistance against a chewing herbivore in Brassica nigra
Source: PubMed Central journal article supplement (PMC5513356; doi:10.1186/s12870-017-1074-7), 2017-07-17
Supplement: 12870_2017_1074_MOESM7_ESM.pdf [file 12870_2017_1074_MOESM7_ESM.pdf]

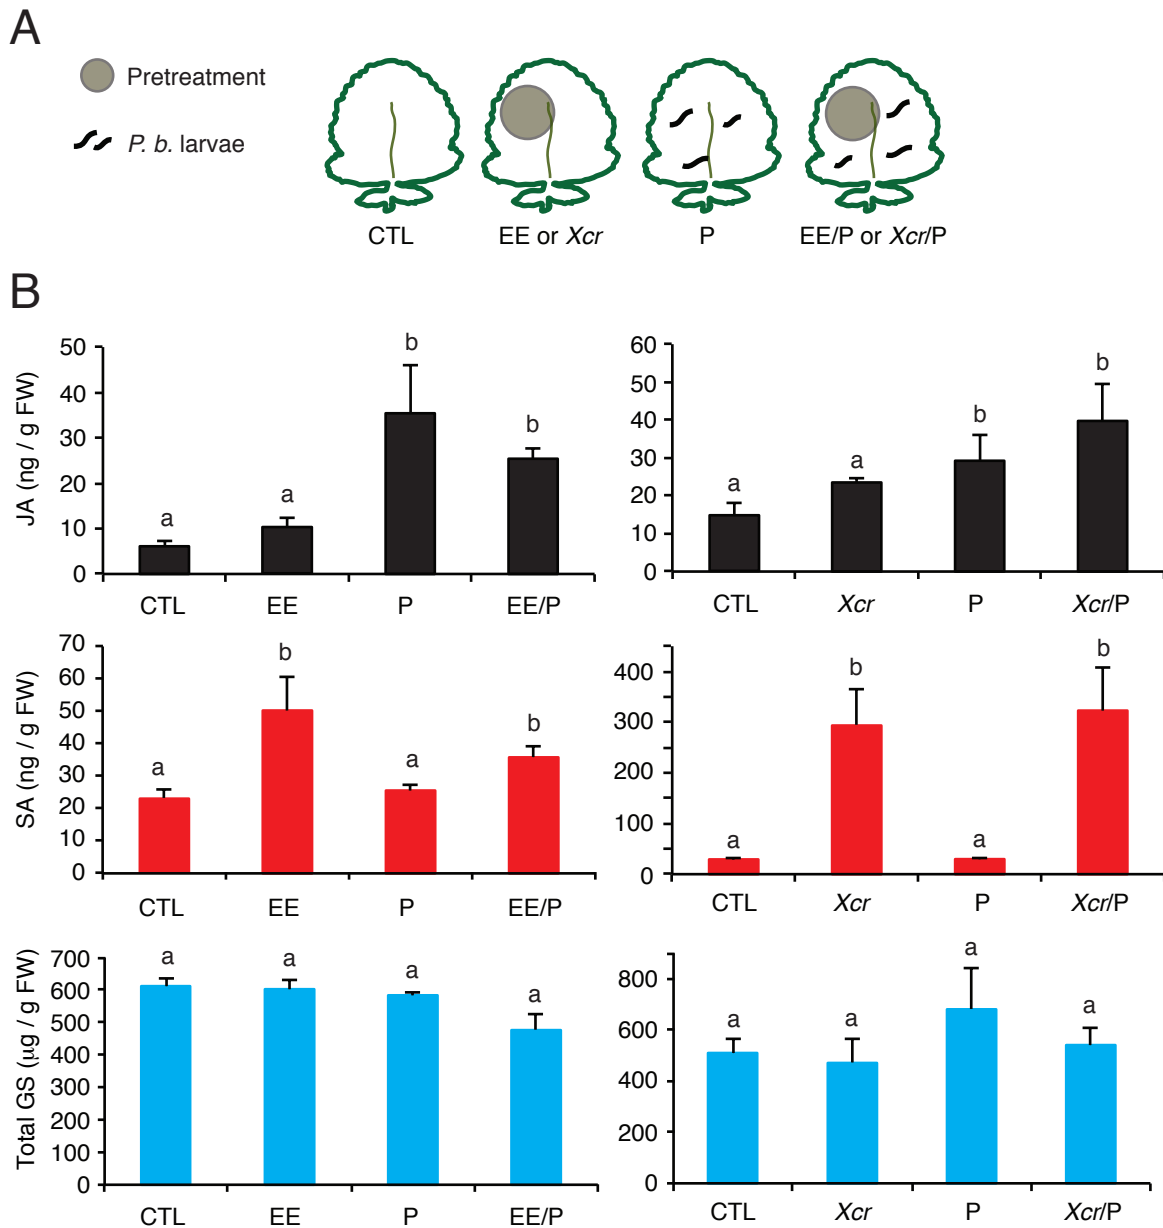

**Fig. S5.** Quantification of defense signals and glucosinolates. (A) Experimental design. (B) Quantification of jasmonic acid (JA), salicylic acid (SA) and total glucosinolates (GS) in single and combined stress in whole 5-week-old *B. nigra* leaves. Plants were pretreated for three days with *P. brassicae* egg extract (EE) or *Xanthomonas campestris* pv. *raphani* (*Xcr*) and further challenged with *P. brassicae* (P) larvae for 24 h. Controls (CTL) consisted of untreated plants or plants exposed to a single treatment. Values ( $\pm$  SE) are the mean of three independent experiments. Letters indicate significant difference between treatments (two-way ANOVA followed by Tukey's honest significant difference test,  $P < 0.05$ ).
