# Supplementary material for: Combined biotic stresses trigger similar transcriptomic responses but contrasting resistance against a chewing herbivore in Brassica nigra
Source: PubMed Central journal article supplement (PMC5513356; doi:10.1186/s12870-017-1074-7), 2017-07-17
Supplement: 12870_2017_1074_MOESM8_ESM.pdf [file 12870_2017_1074_MOESM8_ESM.pdf]

| Table S3. Glucosinolate content in <i>B. nigra</i> leaves |                         |                            |        |            |               |                            |        |            |
|-----------------------------------------------------------|-------------------------|----------------------------|--------|------------|---------------|----------------------------|--------|------------|
|                                                           | Sample                  | Mean ( $\mu\text{g/gFW}$ ) | SE     | % of total | Sample        | Mean ( $\mu\text{g/gFW}$ ) | SE     | % of total |
| <b>Sinigrin</b>                                           | CTL                     | 1133.56                    | 275.22 | 96.36      | CTL           | 600.82                     | 40.58  | 95.04      |
|                                                           | Egg extract (EE)        | 751.69                     | 16.94  | 94.80      | Xcc           | 684.16                     | 82.47  | 91.45      |
|                                                           | Pieris brassicae        | 967.18                     | 119.75 | 95.99      | Pieris        | 576.15                     | 22.36  | 92.91      |
|                                                           | CTL local               | 615.56                     | 144.10 | 94.66      | CTL local     | 828.73                     | 81.89  | 96.16      |
|                                                           | EE + Pieris brassicae   | 546.20                     | 122.66 | 90.97      | Xcc + Pieris  | 701.42                     | 84.57  | 92.05      |
|                                                           | EE distal               | 537.74                     | 76.71  | 92.07      | Xcc distal    | 706.24                     | 133.30 | 93.47      |
|                                                           | Pieris brassicae distal | 533.50                     | 114.16 | 91.48      | Pieris distal | 722.68                     | 167.56 | 94.33      |
| <b>Glucobrassicin</b>                                     | CTL                     | 0.48                       | 0.10   |            | CTL           | 0.28                       | 0.03   |            |
|                                                           | Egg extract (EE)        | 0.46                       | 0.07   |            | Xcc           | 0.21                       | 0.10   |            |
|                                                           | Pieris brassicae        | 0.56                       | 0.11   |            | Pieris        | 0.56                       | 0.16   |            |
|                                                           | CTL local               | 0.36                       | 0.05   |            | CTL local     | 0.35                       | 0.19   |            |
|                                                           | EE + Pieris brassicae   | 0.71                       | 0.11   |            | Xcc + Pieris  | 0.39                       | 0.08   |            |
|                                                           | EE distal               | 0.32                       | 0.17   |            | Xcc distal    | 0.35                       | 0.09   |            |
|                                                           | Pieris brassicae distal | 0.40                       | 0.08   |            | Pieris distal | 0.18                       | 0.10   |            |
| <b>Unknown A</b>                                          | CTL                     | 0.07                       | 0.04   |            | CTL           | 0.09                       | 0.05   |            |
|                                                           | Egg extract (EE)        | 0.03                       | 0.02   |            | Xcc           | 0.06                       | 0.03   |            |
|                                                           | Pieris brassicae        | 0.07                       | 0.03   |            | Pieris        | 0.10                       | 0.04   |            |
|                                                           | CTL local               | 0.04                       | 0.03   |            | CTL local     | 0.06                       | 0.04   |            |
|                                                           | EE + Pieris brassicae   | 0.07                       | 0.01   |            | Xcc + Pieris  | 0.04                       | 0.04   |            |
|                                                           | EE distal               | 0.08                       | 0.02   |            | Xcc distal    | 0.11                       | 0.04   |            |
|                                                           | Pieris brassicae distal | 0.02                       | 0.01   |            | Pieris distal | 0.04                       | 0.04   |            |
| <b>Sinalbin</b>                                           | CTL                     | 10.40                      | 0.09   |            | CTL           | 10.46                      | 0.22   |            |
|                                                           | Egg extract (EE)        | 11.10                      | 0.62   |            | Xcc           | 10.73                      | 0.36   |            |
|                                                           | Pieris brassicae        | 10.64                      | 0.16   |            | Pieris        | 11.28                      | 0.33   |            |
|                                                           | CTL local               | 10.97                      | 0.62   |            | CTL local     | 11.56                      | 0.58   |            |
|                                                           | EE + Pieris brassicae   | 10.28                      | 0.08   |            | Xcc + Pieris  | 17.47                      | 4.54   |            |
|                                                           | EE distal               | 11.72                      | 0.42   |            | Xcc distal    | 12.07                      | 0.74   |            |
|                                                           | Pieris brassicae distal | 10.93                      | 0.51   |            | Pieris distal | 13.25                      | 1.39   |            |
| <b>Gluconapin</b>                                         | CTL                     | 4.17                       | 1.21   |            | CTL           | 2.01                       | 0.17   |            |
|                                                           | Egg extract (EE)        | 2.59                       | 0.30   |            | Xcc           | 2.16                       | 0.27   |            |
|                                                           | Pieris brassicae        | 2.64                       | 0.56   |            | Pieris        | 1.72                       | 0.32   |            |
|                                                           | CTL local               | 2.32                       | 0.82   |            | CTL local     | 2.53                       | 0.57   |            |
|                                                           | EE + Pieris brassicae   | 2.11                       | 0.73   |            | Xcc + Pieris  | 1.84                       | 0.86   |            |
|                                                           | EE distal               | 1.71                       | 0.38   |            | Xcc distal    | 2.59                       | 0.60   |            |
|                                                           | Pieris brassicae distal | 1.79                       | 0.82   |            | Pieris distal | 2.67                       | 0.60   |            |
| <b>Unknown D</b>                                          | CTL                     | 7.27                       | 2.51   |            | CTL           | 2.36                       | 0.50   |            |
|                                                           | Egg extract (EE)        | 4.92                       | 0.90   |            | Xcc           | 4.78                       | 1.07   |            |
|                                                           | Pieris brassicae        | 5.04                       | 2.18   |            | Pieris        | 4.51                       | 1.73   |            |
|                                                           | CTL local               | 4.18                       | 0.42   |            | CTL local     | 2.73                       | 0.32   |            |
|                                                           | EE + Pieris brassicae   | 8.37                       | 1.22   |            | Xcc + Pieris  | 6.14                       | 1.10   |            |
|                                                           | EE distal               | 6.69                       | 1.77   |            | Xcc distal    | 3.97                       | 0.41   |            |
|                                                           | Pieris brassicae distal | 7.35                       | 1.79   |            | Pieris distal | 4.26                       | 0.32   |            |
| <b>Glucotropeolin</b>                                     | CTL                     | 0.51                       | 0.16   |            | CTL           | 0.39                       | 0.07   |            |
|                                                           | Egg extract (EE)        | 0.56                       | 0.11   |            | Xcc           | 0.50                       | 0.17   |            |
|                                                           | Pieris brassicae        | 0.42                       | 0.26   |            | Pieris        | 0.56                       | 0.04   |            |
|                                                           | CTL local               | 0.28                       | 0.10   |            | CTL local     | 0.64                       | 0.24   |            |
|                                                           | EE + Pieris brassicae   | 0.59                       | 0.17   |            | Xcc + Pieris  | 0.93                       | 0.35   |            |
|                                                           | EE distal               | 0.45                       | 0.05   |            | Xcc distal    | 0.66                       | 0.17   |            |
|                                                           | Pieris brassicae distal | 0.45                       | 0.02   |            | Pieris distal | 0.55                       | 0.14   |            |
| <b>Glucobrassicin</b>                                     | CTL                     | 5.66                       | 1.39   |            | CTL           | 3.82                       | 1.08   |            |
|                                                           | Egg extract (EE)        | 8.78                       | 2.71   |            | Xcc           | 23.66                      | 2.86   |            |
|                                                           | Pieris brassicae        | 6.09                       | 2.53   |            | Pieris        | 6.67                       | 2.08   |            |
|                                                           | CTL local               | 4.81                       | 1.04   |            | CTL local     | 3.11                       | 0.51   |            |
|                                                           | EE + Pieris brassicae   | 17.91                      | 3.61   |            | Xcc + Pieris  | 17.65                      | 4.44   |            |
|                                                           | EE distal               | 13.21                      | 2.80   |            | Xcc distal    | 13.88                      | 3.80   |            |
|                                                           | Pieris brassicae distal | 16.44                      | 4.47   |            | Pieris distal | 7.79                       | 1.84   |            |
| <b>Hydroxyglucobrassicin</b>                              | CTL                     | 0.60                       | 0.19   |            | CTL           | 0.20                       | 0.01   |            |
|                                                           | Egg extract (EE)        | 0.58                       | 0.14   |            | Xcc           | 1.27                       | 0.30   |            |
|                                                           | Pieris brassicae        | 0.51                       | 0.17   |            | Pieris        | 0.32                       | 0.25   |            |
|                                                           | CTL local               | 0.27                       | 0.17   |            | CTL local     | 0.28                       | 0.13   |            |
|                                                           | EE + Pieris brassicae   | 1.63                       | 0.42   |            | Xcc + Pieris  | 1.08                       | 0.04   |            |
|                                                           | EE distal               | 1.22                       | 0.42   |            | Xcc distal    | 0.39                       | 0.23   |            |
|                                                           | Pieris brassicae distal | 1.38                       | 0.64   |            | Pieris distal | 0.49                       | 0.14   |            |
| <b>2-Hydroxy-2-phenylethyl</b>                            | CTL                     | 8.75                       | 1.97   |            | CTL           | 6.28                       | 1.30   |            |
|                                                           | Egg extract (EE)        | 6.24                       | 1.03   |            | Xcc           | 7.57                       | 1.55   |            |
|                                                           | Pieris brassicae        | 6.69                       | 0.42   |            | Pieris        | 6.69                       | 1.03   |            |
|                                                           | CTL local               | 6.61                       | 1.25   |            | CTL local     | 6.74                       | 1.75   |            |
|                                                           | EE + Pieris brassicae   | 6.31                       | 0.90   |            | Xcc + Pieris  | 6.69                       | 1.20   |            |
|                                                           | EE distal               | 4.61                       | 0.92   |            | Xcc distal    | 6.93                       | 0.43   |            |
|                                                           | Pieris brassicae distal | 5.82                       | 0.95   |            | Pieris distal | 7.04                       | 1.48   |            |
| <b>Gluconasturtin</b>                                     | CTL                     | 3.92                       | 0.82   |            | CTL           | 2.81                       | 0.96   |            |
|                                                           | Egg extract (EE)        | 2.65                       | 0.30   |            | Xcc           | 5.32                       | 2.11   |            |
|                                                           | Pieris brassicae        | 5.44                       | 2.42   |            | Pieris        | 9.39                       | 1.71   |            |
|                                                           | CTL local               | 3.11                       | 0.67   |            | CTL local     | 3.50                       | 1.63   |            |
|                                                           | EE + Pieris brassicae   | 2.28                       | 0.79   |            | Xcc + Pieris  | 2.38                       | 1.05   |            |
|                                                           | EE distal               | 2.99                       | 0.29   |            | Xcc distal    | 1.63                       | 0.33   |            |
|                                                           | Pieris brassicae distal | 3.61                       | 0.34   |            | Pieris distal | 2.92                       | 1.81   |            |
| <b>Methoxyglucobrassicin</b>                              | CTL                     | 0.86                       | 0.16   |            | CTL           | 2.53                       | 0.52   |            |
|                                                           | Egg extract (EE)        | 3.23                       | 1.47   |            | Xcc           | 7.55                       | 2.04   |            |
|                                                           | Pieris brassicae        | 1.64                       | 0.76   |            | Pieris        | 1.78                       | 0.18   |            |
|                                                           | CTL local               | 1.55                       | 0.60   |            | CTL local     | 1.49                       | 0.72   |            |
|                                                           | EE + Pieris brassicae   | 3.56                       | 0.58   |            | Xcc + Pieris  | 5.57                       | 1.05   |            |
|                                                           | EE distal               | 3.21                       | 0.53   |            | Xcc distal    | 6.59                       | 1.30   |            |
|                                                           | Pieris brassicae distal | 1.14                       | 0.12   |            | Pieris distal | 4.04                       | 0.64   |            |
| <b>Neoglucobrassicin</b>                                  | CTL                     | 0.19                       | 0.06   |            | CTL           | 0.15                       | 0.07   |            |
|                                                           | Egg extract (EE)        | 0.09                       | 0.05   |            | Xcc           | 0.14                       | 0.05   |            |
|                                                           | Pieris brassicae        | 0.61                       | 0.27   |            | Pieris        | 0.37                       | 0.10   |            |
|                                                           | CTL local               | 0.20                       | 0.05   |            | CTL local     | 0.07                       | 0.04   |            |
|                                                           | EE + Pieris brassicae   | 0.40                       | 0.02   |            | Xcc + Pieris  | 0.37                       | 0.17   |            |
|                                                           | EE distal               | 0.12                       | 0.06   |            | Xcc distal    | 0.14                       | 0.06   |            |
|                                                           | Pieris brassicae distal | 0.35                       | 0.03   |            | Pieris distal | 0.23                       | 0.07   |            |
| <b>Total GS</b>                                           | CTL                     | 1176.43                    | 274.90 |            | CTL           | 632.20                     | 39.76  |            |
|                                                           | Egg extract (EE)        | 792.92                     | 19.93  |            | Xcc           | 748.10                     | 88.63  |            |
|                                                           | Pieris brassicae        | 1007.54                    | 121.95 |            | Pieris        | 620.10                     | 27.03  |            |
|                                                           | CTL local               | 650.25                     | 143.47 |            | CTL local     | 861.80                     | 84.44  |            |
|                                                           | EE + Pieris brassicae   | 600.43                     | 122.69 |            | Xcc + Pieris  | 761.98                     | 88.80  |            |
|                                                           | EE distal               | 584.07                     | 72.98  |            | Xcc distal    | 755.54                     | 140.24 |            |
|                                                           | Pieris brassicae distal | 583.19                     | 109.67 |            | Pieris distal | 766.14                     | 172.02 |            |
