# Supplementary material for: Combined biotic stresses trigger similar transcriptomic responses but contrasting resistance against a chewing herbivore in Brassica nigra
Source: PubMed Central journal article supplement (PMC5513356; doi:10.1186/s12870-017-1074-7), 2017-07-17
Supplement: 12870_2017_1074_MOESM9_ESM.pdf [file 12870_2017_1074_MOESM9_ESM.pdf]

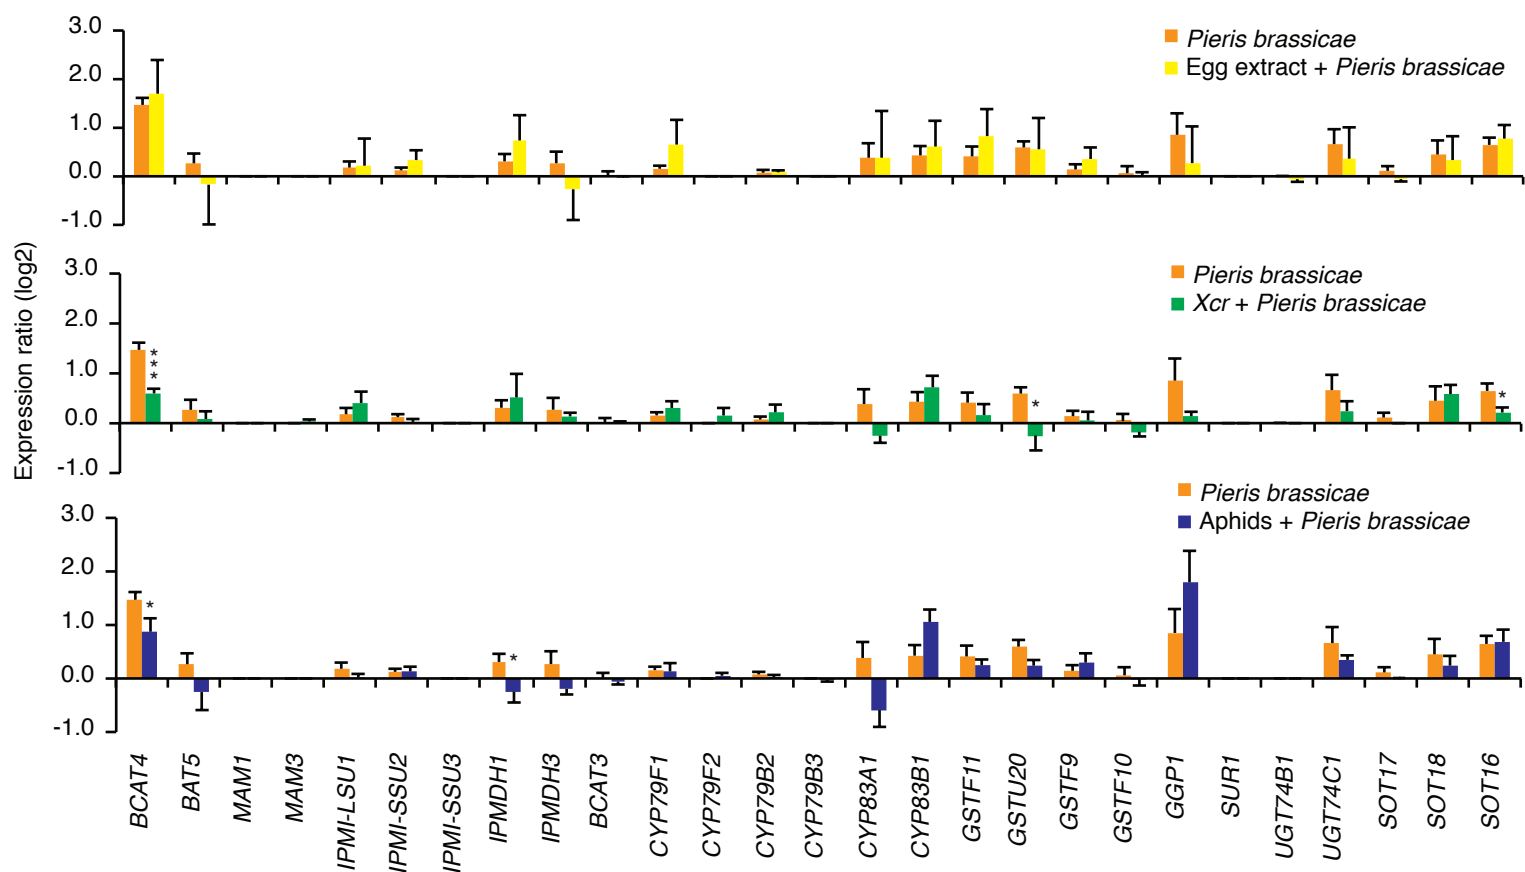

**Fig. S6.** Expression of glucosinolate biosynthesis genes in response to *P. brassicae* feeding and combined stresses. Values were extracted from microarray data. *P. brassicae* larvae (orange bars), egg extract/*P. brassicae* larvae (yellow bars), *Xanthomonas campestris* pv. *raphani*/*P. brassicae* (green bars), *Brevicoryne brassicae*/*P. brassicae* (blue bars). Significant differences between single and combined stress are indicated (Student's *t*-test, \*\*\* $P < 0.001$ , \*\* $P < 0.01$ , \* $P < 0.05$ ).
