# Supplementary material for: Combined biotic stresses trigger similar transcriptomic responses but contrasting resistance against a chewing herbivore in Brassica nigra
Source: PubMed Central journal article supplement (PMC5513356; doi:10.1186/s12870-017-1074-7), 2017-07-17
Supplement: 12870_2017_1074_MOESM10_ESM.pdf [file 12870_2017_1074_MOESM10_ESM.pdf]

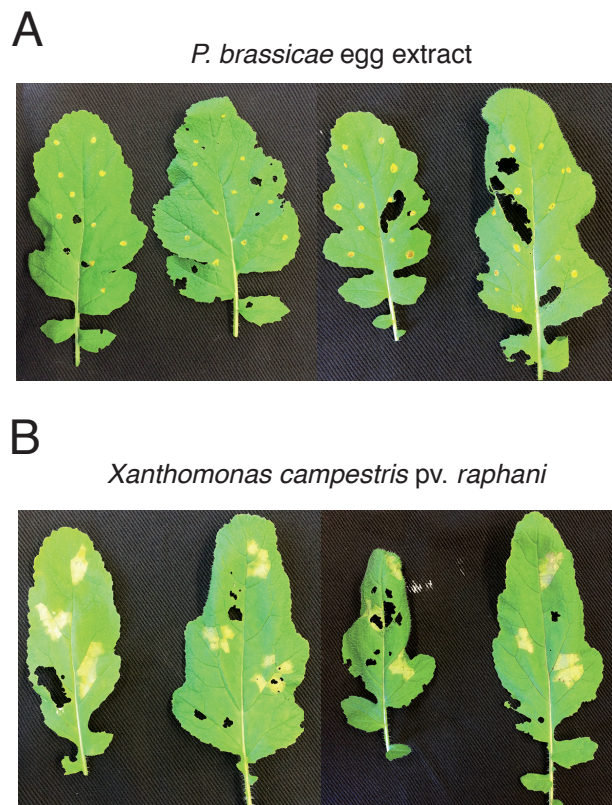

**Fig. S7.** Feeding behavior of *P. brassicae* larvae in response to combined stresses. Neonate larvae were allowed to feed freely for 2 days (*P. brassicae*) on 5-week-old *B. nigra* plants pretreated for three days with egg extract (A) or *Xanthomonas campestris* pv. *raphani*. (B). Representative images from three biological replicates are shown. Scale bar = 1 cm.
