# Supplementary material for: Combined biotic stresses trigger similar transcriptomic responses but contrasting resistance against a chewing herbivore in Brassica nigra
Source: PubMed Central journal article supplement (PMC5513356; doi:10.1186/s12870-017-1074-7), 2017-07-17
Supplement: 12870_2017_1074_MOESM12_ESM.pdf [file 12870_2017_1074_MOESM12_ESM.pdf]

**Table S5.** List of primers used for QPCR

| Gene           | Arabidopsis AGI | Primer | Sequence (5' - 3')      |
|----------------|-----------------|--------|-------------------------|
| <i>BnVSP2</i>  | At5g24770       | Fwd    | GGGAACGTAGCCGAACTCTT    |
|                |                 | Rev    | CGAAGTCCTTTGGCATAGAAA   |
| <i>BNMYC2</i>  | At1g32640       | Fwd    | GTGGAATCGAGCAAGAGGAA    |
|                |                 | Rev    | ATCGTTAACCACCGACATACT   |
| <i>BnPR2</i>   | At3g57260       | Fwd    | GTGATAGATTTCTTGGTAAGCA  |
|                |                 | Rev    | ACCACGATTTCCAACGATCC    |
| <i>BnSAG13</i> | At2g29350       | Fwd    | AAACTCATGGAAACCGTTTCC   |
|                |                 | Rev    | TAGATGGATCCAACATTAATATG |
| <i>BnSAND</i>  | At2g28390       | Fwd    | TGCTTGGAGGGACAGATGC     |
|                |                 | Rev    | AACCTTGTGTCTGCACATTAG   |
