# Supplementary material for: Combined biotic stresses trigger similar transcriptomic responses but contrasting resistance against a chewing herbivore in Brassica nigra
Source: BMC Plant Biol. 2017 Jul 17;17:127. doi: 10.1186/s12870-017-1074-7 (PMC5513356; doi:10.1186/s12870-017-1074-7)
Supplement: Supplementary file 11 — Overall experimental design. (PDF 48 kb) [file 12870_2017_1074_MOESM11_ESM.pdf]

**Table S4.** Overall experimental design

| 1 <sup>st</sup> stress<br>(pretreatment) |           | 2 <sup>nd</sup> stress<br>(caterpillars)                                             |             | Measurements                                                | Figures                            |
|------------------------------------------|-----------|--------------------------------------------------------------------------------------|-------------|-------------------------------------------------------------|------------------------------------|
| None<br>Egg extract<br>Pathogen          | 72 h<br>→ | None<br>Unconstrained feeding                                                        | 24 h<br>→   | Leaf tissues for microarrays<br>Leaf tissues for JA, SA, GS | <b>Fig. 1, 2</b><br><b>Fig. S5</b> |
|                                          |           |                                                                                      | 7 days<br>→ | Caterpillar performance<br>unconstrained                    | <b>Fig. 3A</b>                     |
|                                          |           |                                                                                      |             |                                                             |                                    |
|                                          |           | Constrained feeding<br>- at site of pretreatment<br>- at site distal to pretreatment | 24 h<br>→   | Leaf tissues for JA, SA, GS<br>Leaf tissues for QPCR        | <b>Fig. 4</b><br><b>Fig. 5</b>     |
|                                          |           |                                                                                      | 4 days<br>→ | Caterpillar performance<br>constrained                      | <b>Fig. 3B</b>                     |
|                                          |           |                                                                                      |             |                                                             |                                    |
| None<br>Aphids                           | 48 h<br>→ | None<br>Unconstrained feeding                                                        | 24 h<br>→   | Leaf tissues for microarrays                                | <b>Fig. 1, 2</b>                   |
